# Supplementary material
Source: publisher site journal article supplement (https://www.spandidos-publications.com/7481/downloadSupplementary)

Figure S1. Correlation plot of pain levels and drug additive in patient groups.

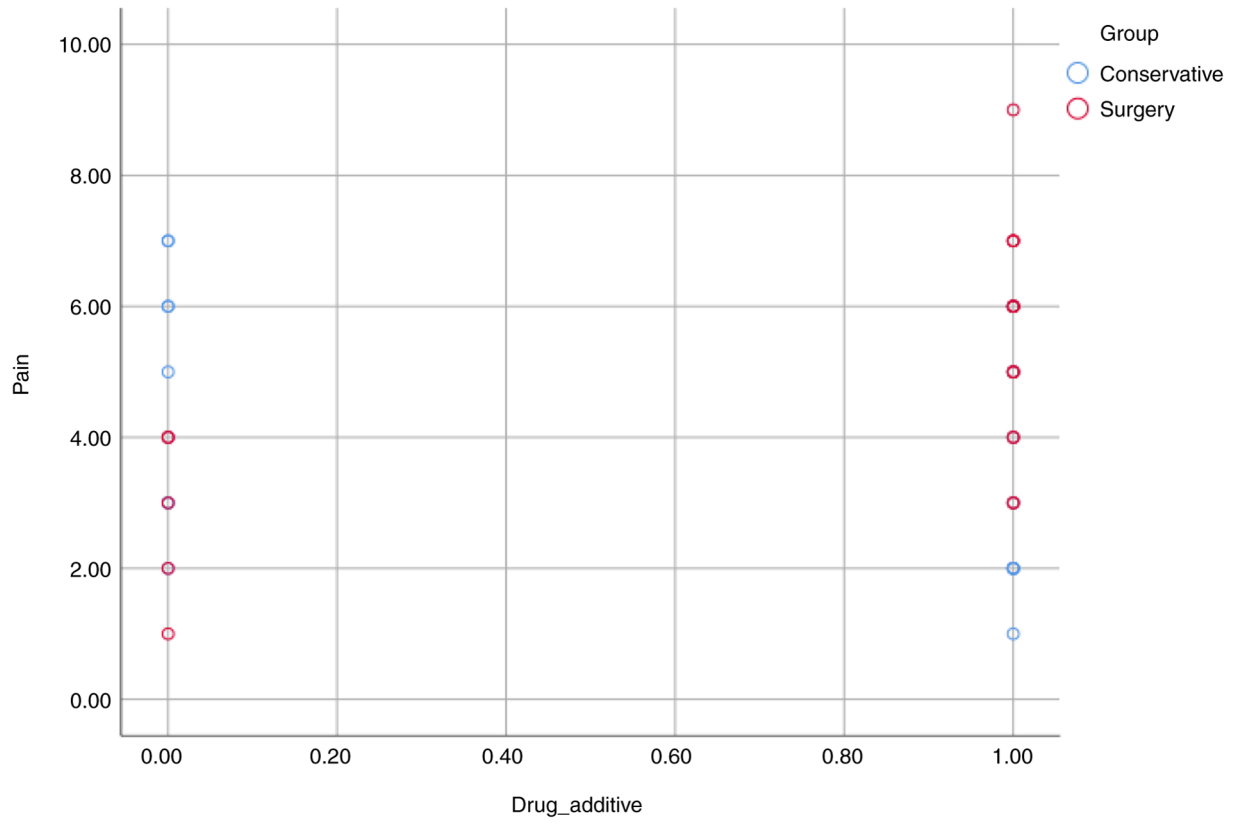

Figure S2. Correlation plot of pain levels and narcotic drug dose in the surgery group.

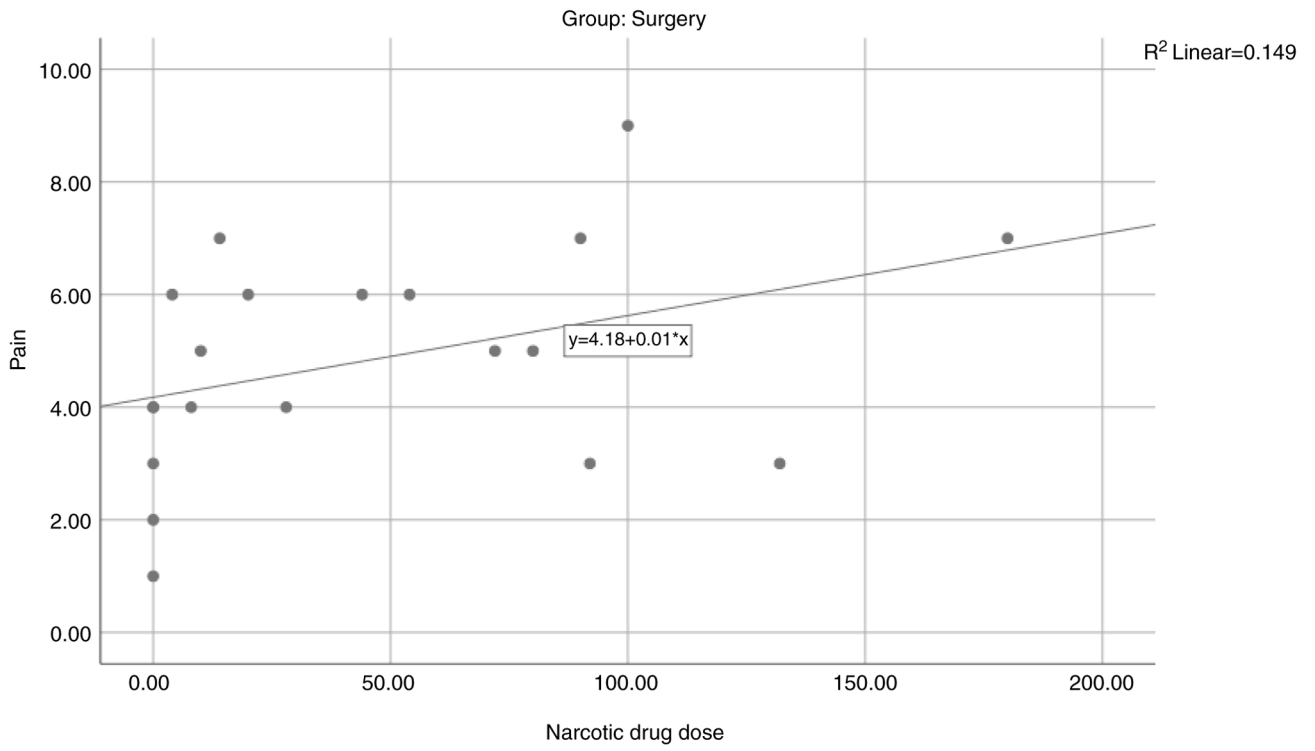

Figure S3. Correlation plot of pain levels and hospitalization duration in the conservative group.

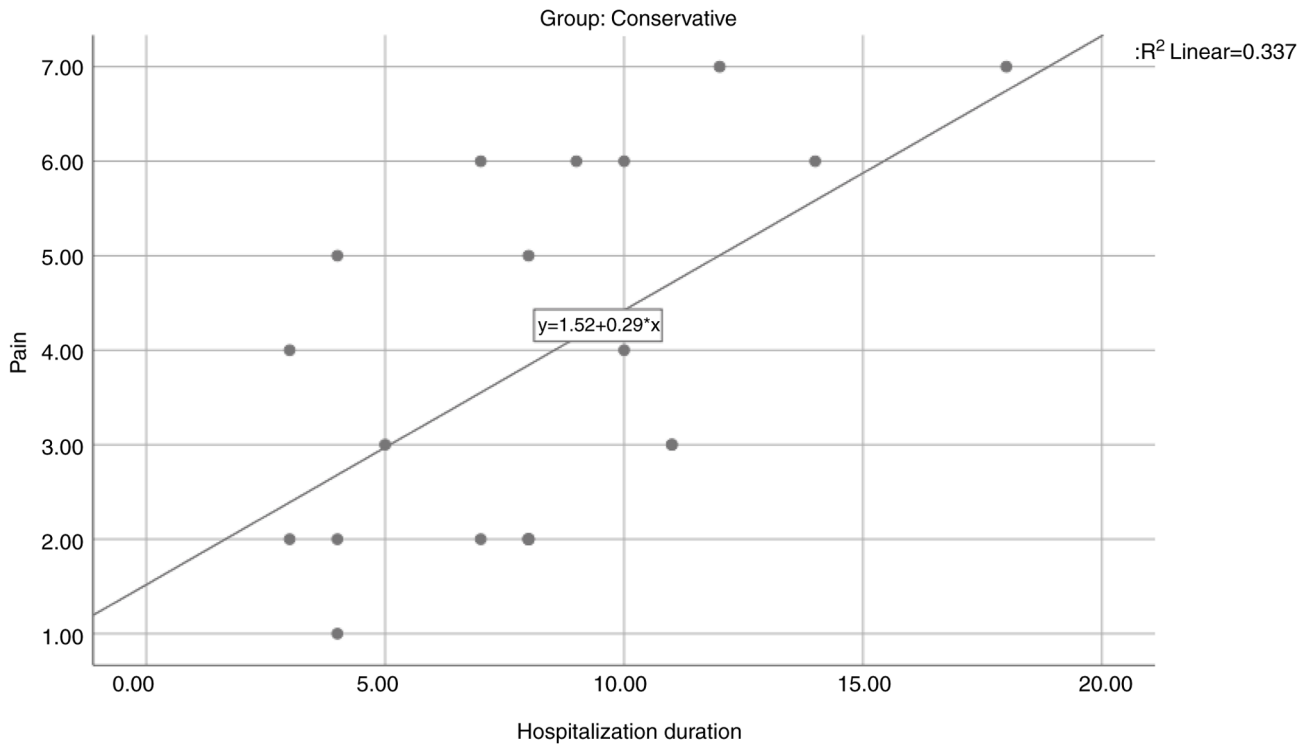

Figure S4. Correlation plot of pain levels and FEV1 in the conservative group. FEV1, forced expiratory volume in 1 sec.

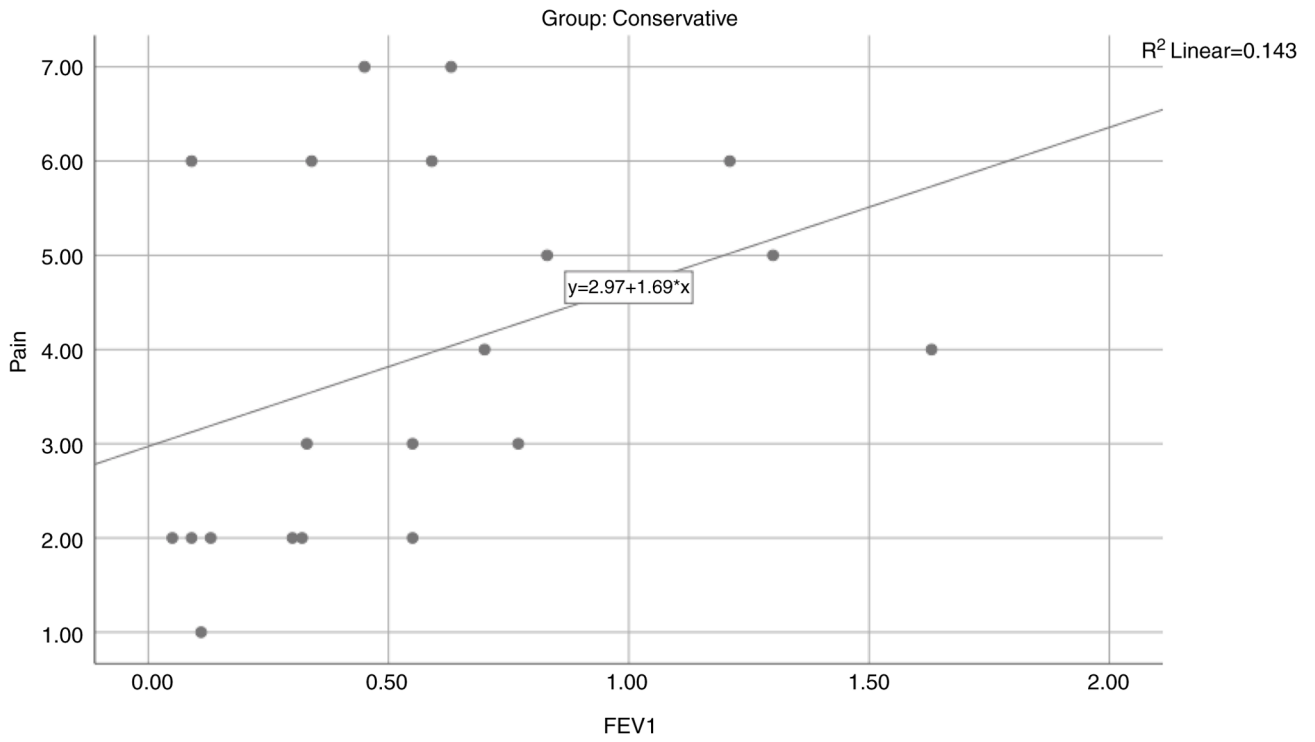

Supplement: Supplementary file 1 [file downloadSupplementary]
